# Supplementary material for: Voltammetric determination of trace amounts of permanganate at a zeolite modified carbon paste electrode
Source: Royal Society of Chemistry journal article supplement (doi:10.1039/c7nj03076b), 2017-01-01
Supplement: c7nj03076b1.pdf [file c7nj03076b1.pdf]

## Supplementary Materials:

### TSM1. Experimental matrix and results for RSM design.

| Std | Run | X <sub>1</sub> : Step pot. | X <sub>2</sub> : Amplitude | X <sub>3</sub> : pH | X <sub>4</sub> : Modif. % |
|-----|-----|----------------------------|----------------------------|---------------------|---------------------------|
| 2   | 1   | 0.5                        | 1.7                        | 0.02                | 12.5                      |
| 14  | 2   | 0.5                        | 1.7                        | 0.03                | 17.5                      |
| 8   | 3   | 0.5                        | 5                          | 0.03                | 12.5                      |
| 6   | 4   | 0.5                        | 1.7                        | 0.03                | 12.5                      |
| 3   | 5   | 0.17                       | 5                          | 0.02                | 12.5                      |
| 27  | 6   | 0.335                      | 3.35                       | 0.025               | 15                        |
| 12  | 7   | 0.5                        | 5                          | 0.02                | 17.5                      |
| 1   | 8   | 0.17                       | 1.7                        | 0.02                | 12.5                      |
| 15  | 9   | 0.17                       | 5                          | 0.03                | 17.5                      |
| 17  | 10  | 0.005                      | 3.35                       | 0.025               | 15                        |
| 25  | 11  | 0.335                      | 3.35                       | 0.025               | 15                        |
| 4   | 12  | 0.5                        | 5                          | 0.02                | 12.5                      |
| 10  | 13  | 0.5                        | 1.7                        | 0.02                | 17.5                      |
| 13  | 14  | 0.17                       | 1.7                        | 0.03                | 17.5                      |
| 5   | 15  | 0.17                       | 1.7                        | 0.03                | 12.5                      |
| 29  | 16  | 0.335                      | 3.35                       | 0.025               | 15                        |
| 21  | 17  | 0.335                      | 3.35                       | 0.015               | 15                        |
| 28  | 18  | 0.335                      | 3.35                       | 0.025               | 15                        |
| 24  | 19  | 0.335                      | 3.35                       | 0.025               | 20                        |
| 26  | 20  | 0.335                      | 3.35                       | 0.025               | 15                        |
| 19  | 21  | 0.335                      | 0.05                       | 0.025               | 15                        |
| 20  | 22  | 0.335                      | 6.65                       | 0.025               | 15                        |
| 23  | 23  | 0.335                      | 3.35                       | 0.025               | 10                        |
| 22  | 24  | 0.335                      | 3.35                       | 0.035               | 15                        |
| 18  | 25  | 0.665                      | 3.35                       | 0.025               | 15                        |
| 16  | 26  | 0.5                        | 5                          | 0.03                | 17.5                      |
| 11  | 27  | 0.17                       | 5                          | 0.02                | 17.5                      |
| 9   | 28  | 0.17                       | 1.7                        | 0.02                | 17.5                      |
| 7   | 29  | 0.17                       | 5                          | 0.03                | 12.5                      |
| 30  | 30  | 0.335                      | 3.35                       | 0.025               | 15                        |

### TSM2. Results of experimental runs compared with the predicted values by the model.

| Variable                 | Step potential (V) | Amplitude (V) | pH | Modifier % |
|--------------------------|--------------------|---------------|----|------------|
| Optimized values         | 0.023              | 0.500         | 2  | 16.5       |
| Suggested model          | Quadratic          |               |    |            |
| Aver. predicted response | 48.5056            |               |    |            |
| 95% CI low and high      | 48.0814-48.9299    |               |    |            |
| Predicted Std Dev        | 0.378001           |               |    |            |
| Observed response (n=3)  | 48.63 (±0.57)      |               |    |            |

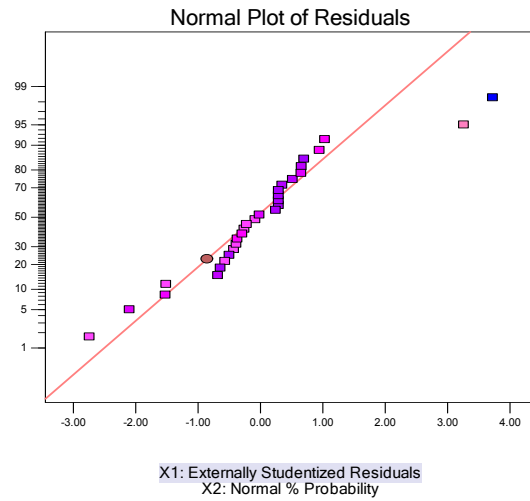

**A**

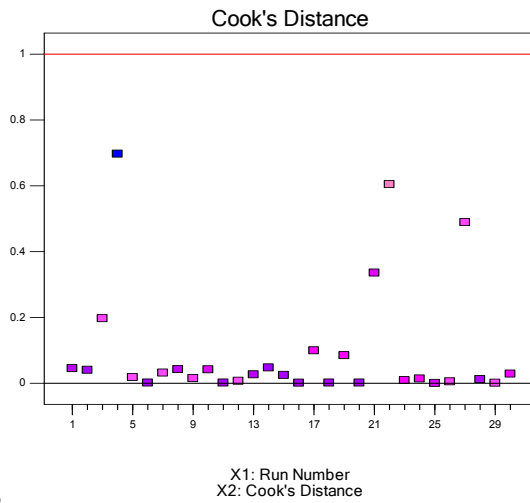

**B**

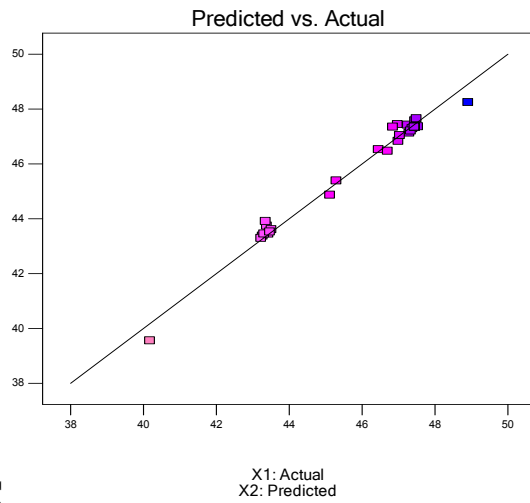

**C**

**FSM1. A)** Normal probability of internally residuals; **B)** Cook's distance results for diagnostic of distribution of data; **C)** Predicted versus actual values.

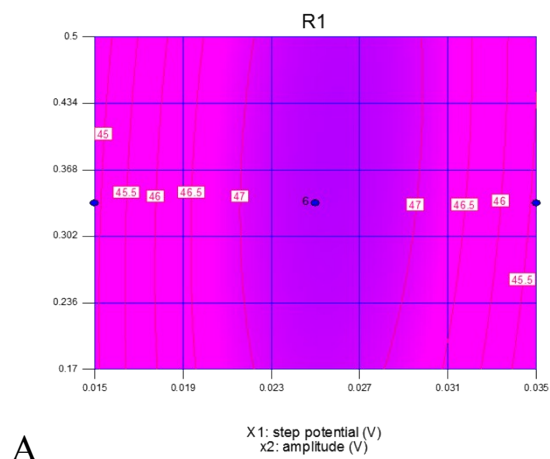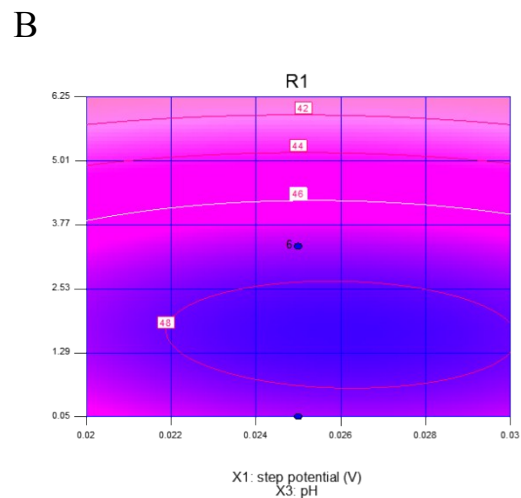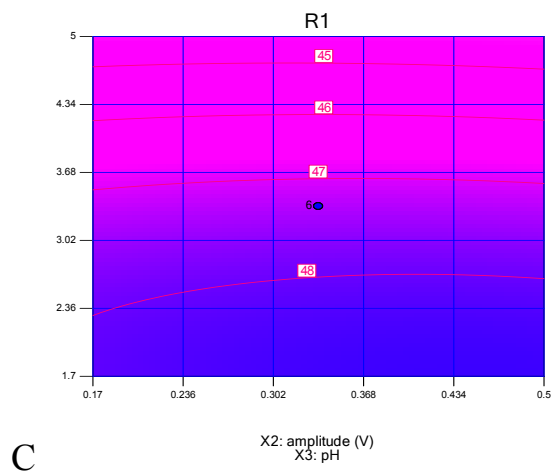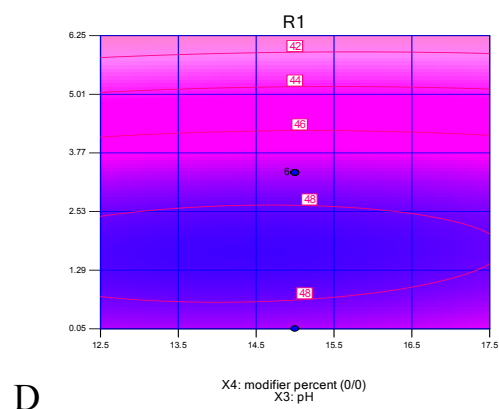

**FSM2.** Some selected 2D counters plots for showing visualize interaction effects of step potential ( $X_1$ ), amplitude ( $X_2$ ), pH ( $X_3$ ), modifier% ( $X_4$ ), and their interaction on CV response of Fe(II) in the presence of permanganate.
